# Supplementary material for: Structure and stability of aluminium doped lithium clusters (LinAl0/+, n = 1–8): a case of the phenomenological shell model
Source: Royal Society of Chemistry journal article supplement (doi:10.1039/c003401k), 2010-01-01
Supplement: c003401k.pdf [file c003401k.pdf]

## Electronic Supporting Information

### Structure and Stability of Aluminum Doped Lithium Clusters

#### (Li<sub>n</sub>Al<sup>0/+</sup>, n = 1 - 8): A Case of the Phenomenological Shell Model

Truong Ba Tai, Pham Vu Nhat and Minh Tho Nguyen

**Table 1.** The total energy  $E$ , zero point energies (ZPE) and relative energies ( $\Delta E$ ) of all isomers using the B3LYP/aug-cc-pVTZ level.

| Structures                                                               | E            | ZPE       | $\Delta E$ |
|--------------------------------------------------------------------------|--------------|-----------|------------|
| LiAl ( <sup>1</sup> $\Sigma^+$ )                                         | -249.9156285 | 0.0006920 | 0.00       |
| LiAl ( <sup>3</sup> $\Sigma_g^+$ )                                       | -249.9083532 | 0.0007460 | 4.60       |
| Li <sub>2</sub> Al-I (C <sub>2v</sub> , <sup>2</sup> B <sub>2</sub> )    | -257.4457577 | 0.0017501 | 0.00       |
| Li <sub>2</sub> Al-II ( <sup>2</sup> $\Sigma^+$ )                        | -257.4455293 | 0.0017132 | 0.12       |
| Li <sub>2</sub> Al-III (C <sub>2v</sub> , <sup>2</sup> A <sub>1</sub> )  | -257.4366085 | 0.0020015 | 5.90       |
| Li <sub>2</sub> Al-II ( <sup>2</sup> $\Sigma^+$ )                        | -257.4253162 | 0.0016246 | 12.75      |
| Li <sub>3</sub> Al-I (C <sub>2v</sub> , <sup>1</sup> A <sub>1</sub> )    | -264.9893279 | 0.0032495 | 0.00       |
| Li <sub>3</sub> Al-II (D <sub>3h</sub> , <sup>1</sup> A <sub>1</sub> ' ) | -264.9771896 | 0.0028200 | 7.35       |
| Li <sub>3</sub> Al-III (C <sub>3v</sub> , <sup>3</sup> A <sub>1</sub> )  | -264.9865588 | 0.0033714 | 1.81       |
| Li <sub>3</sub> Al-IV (C <sub>2v</sub> , <sup>3</sup> B <sub>2</sub> )   | -264.9526748 | 0.0023597 | 22.44      |
| Li <sub>4</sub> Al-I (C <sub>2v</sub> , <sup>2</sup> B <sub>2</sub> )    | -272.5344883 | 0.0049952 | 0.00       |
| Li <sub>4</sub> Al-II (C <sub>4v</sub> , <sup>2</sup> A <sub>1</sub> )   | -272.5254194 | 0.0044913 | 5.37       |
| Li <sub>4</sub> Al-III (D <sub>4h</sub> , <sup>2</sup> A <sub>2u</sub> ) | -272.5212557 | 0.0041636 | 7.78       |
| Li <sub>4</sub> Al-IV (C <sub>3v</sub> , <sup>4</sup> A <sub>1</sub> )   | -272.5100645 | 0.0047590 | 15.18      |
| Li <sub>4</sub> Al-V (C <sub>2v</sub> , <sup>4</sup> A <sub>2</sub> )    | -272.4930018 | 0.0039015 | 25.35      |
| Li <sub>5</sub> Al-I (C <sub>4v</sub> , <sup>1</sup> A <sub>1</sub> )    | -280.0864923 | 0.0066948 | 0.00       |
| Li <sub>5</sub> Al-II (C <sub>s</sub> , <sup>3</sup> A')                 | -280.0590508 | 0.0060262 | 16.80      |

|                                                   |              |           |      |
|---------------------------------------------------|--------------|-----------|------|
| <b>Li<sub>6</sub>Al-I</b> ( $C_s, {}^2A'$ )       | -287.6145639 | 0.0075656 | 0.00 |
| <b>Li<sub>6</sub>Al-II</b> ( $C_{5v}, {}^2A_1$ )  | -287.6119324 | 0.0074678 | 1.60 |
| <b>Li<sub>6</sub>Al-III</b> ( $O_h, {}^2A_{1g}$ ) | -287.6094412 | 0.0060032 | 2.23 |
| <b>Li<sub>7</sub>Al-I</b> ( $C_s, {}^1A'$ )       | -295.1461407 | 0.0086901 | 0.81 |
| <b>Li<sub>7</sub>Al-II</b> ( $C_s, {}^1A'$ )      | -295.1479198 | 0.0091747 | 0.00 |
| <b>Li<sub>7</sub>Al-III</b> ( $C_s, {}^1A'$ )     | -295.146041  | 0.0088299 | 0.96 |
| <b>Li<sub>7</sub>Al-V</b> ( $C_{3v}, {}^1A_1$ )   | -295.1446743 | 0.0079845 | 1.29 |
| <b>Li<sub>7</sub>Al-VI</b> ( $C_{2v}, {}^1A_1$ )  | -295.1454135 | 0.0083970 | 1.08 |
| <b>Li<sub>8</sub>Al-I</b> ( $C_{2v}, {}^2A_1$ )   | -302.6742371 | 0.0099649 | 0.76 |
| <b>Li<sub>8</sub>Al-II</b> ( $C_s, 2A'$ )         | -302.6757579 | 0.0102692 | 0.00 |

|                                                     |              |           |       |
|-----------------------------------------------------|--------------|-----------|-------|
| <b>LiAl</b> ( ${}^2\Sigma^+$ )                      | -249.7229883 | 0.0005060 | 0.00  |
| <b>Li<sub>2</sub>Al-Ic</b> ( ${}^1\Sigma_g^+$ )     | -257.2872655 | 0.0021349 | 0.00  |
| <b>Li<sub>2</sub>Al-IIc</b> ( $C_{2v}, {}^1A_1$ )   | -257.2590054 | 0.0014707 | 17.32 |
| <b>Li<sub>3</sub>Al-Ic</b> ( $C_{2v}, {}^2B_2$ )    | -264.8226129 | 0.0030767 | 0.00  |
| <b>Li<sub>3</sub>Al-IIc</b> ( $C_{2v}, {}^2A_1$ )   | -264.8188146 | 0.0027070 | 2.15  |
| <b>Li<sub>3</sub>Al-IIIc</b> ( $C_{3v}, {}^2A_1$ )  | -264.7983692 | 0.0024157 | 14.80 |
| <b>Li<sub>4</sub>Al-Ic</b> ( $D_{4h}, {}^1A_{1g}$ ) | -272.3761812 | 0.0043954 | 0.00  |
| <b>Li<sub>4</sub>Al-IIc</b> ( $C_{2v}, {}^1A_1$ )   | -272.3553701 | 0.0040422 | 12.84 |
| <b>Li<sub>4</sub>Al-IIIc</b> ( $C_{3v}, {}^1A_1$ )  | -272.340714  | 0.0039800 | 22.00 |
| <b>Li<sub>5</sub>Al-Ic</b> ( $C_{4v}, {}^2A_1$ )    | -279.9169918 | 0.0053420 | 0.00  |
| <b>Li<sub>5</sub>Al-IIc</b> ( $C_s, {}^2A'$ )       | -279.9172865 | 0.0056587 | 0.00  |
| <b>Li<sub>6</sub>Al-Ic</b> ( $O_h, {}^1A_{1g}$ )    | -287.478723  | 0.0070690 | 0.00  |
| <b>Li<sub>6</sub>Al-IIc</b> ( $C_{5v}, {}^1A_1$ )   | -287.4680624 | 0.0078527 | 7.18  |
| <b>Li<sub>7</sub>Al-Ic</b> ( $D_{5h}, {}^2A_1'$ )   | -294.9999309 | 0.0066507 | 0.45  |
| <b>Li<sub>7</sub>Al-IIc</b> ( $C_{3v}, {}^2A_1$ )   | -295.0019556 | 0.0080228 | 0.04  |
| <b>Li<sub>7</sub>Al-IIIc</b> ( $C_{2v}, {}^2A_1$ )  | -295.0023913 | 0.0083974 | 0.00  |

|                                                 |              |           |      |
|-------------------------------------------------|--------------|-----------|------|
| <b>Li<sub>8</sub>Al-Ic</b> ( $C_{3v}, ^1A_1$ )  | -302.5430025 | 0.0105066 | 0.00 |
| <b>Li<sub>8</sub>Al-IIc</b> ( $D_{2d}, ^1A_1$ ) | -302.5303711 | 0.0093922 | 7.23 |

**Table S2.** Total energy of the global minimum  $Li_nAl^{0/+}$  using the CCSD(T)/aug-cc-pVaZ (a = D, T, Q) level and Extrapolated CBS energies.

| <b>Total energies, a.u</b>                    |             |
|-----------------------------------------------|-------------|
| <b>LiAl</b> ( $C_{\infty h}, ^1\Sigma^+$ )    |             |
| CCSD(T)/aug-cc-pVDZ                           | -249.388712 |
| CCSD(T)/aug-cc-pVTZ                           | -249.401466 |
| CCSD(T)/aug-cc-pVQZ                           | -249.404596 |
| CBS                                           | -249.40627  |
| <b>Li<sub>2</sub>Al-I</b> ( $C_{2v}, ^2B_2$ ) |             |
| CCSD(T)/aug-cc-pVDZ                           | -256.863452 |
| CCSD(T)/aug-cc-pVTZ                           | -256.878776 |
| CCSD(T)/aug-cc-pVQZ                           | -256.882479 |
| CBS                                           | -256.88445  |
| <b>Li<sub>3</sub>Al-I</b> ( $C_{2v}, ^1A_1$ ) |             |
| CCSD(T)/aug-cc-pVDZ                           | -264.346204 |
| CCSD(T)/aug-cc-pVTZ                           | -264.365479 |
| CCSD(T)/aug-cc-pVQZ                           | -264.370111 |
| CBS                                           | -264.37257  |
| <b>Li<sub>4</sub>Al-I</b> ( $C_{2v}, ^2B_2$ ) |             |

|                                                                         |             |
|-------------------------------------------------------------------------|-------------|
| CCSD(T)/aug-cc-pVDZ                                                     | -271.834099 |
| CCSD(T)/aug-cc-pVTZ                                                     | -271.856894 |
| CCSD(T)/aug-cc-pVQZ                                                     | -271.862237 |
| CBS                                                                     | -271.86506  |
| <b>Li<sub>5</sub>Al-I (C<sub>4v</sub>, <sup>1</sup>A<sub>1</sub>)</b>   |             |
| CCSD(T)/aug-cc-pVDZ                                                     | -279.332100 |
| CCSD(T)/aug-cc-pVTZ                                                     | -279.358101 |
| CCSD(T)/aug-cc-pVQZ                                                     | -279.364254 |
| CBS                                                                     | -279.36751  |
| <b>LiAl (<sup>2</sup>Σ<sup>+</sup>)</b>                                 |             |
| CCSD(T)/aug-cc-pVDZ                                                     | -249.200597 |
| CCSD(T)/aug-cc-pVTZ                                                     | -249.210374 |
| CCSD(T)/aug-cc-pVQZ                                                     | -249.212868 |
| CBS                                                                     | -249.21421  |
| <b>Li<sub>2</sub>Al-Ic (<sup>1</sup>Σ<sup>+</sup><sub>g</sub>)</b>      |             |
| CCSD(T)/aug-cc-pVDZ                                                     | -256.705465 |
| CCSD(T)/aug-cc-pVTZ                                                     | -256.721269 |
| CCSD(T)/aug-cc-pVQZ                                                     | -256.724893 |
| CBS                                                                     | -256.72679  |
| <b>Li<sub>3</sub>Al-Ic (C<sub>2v</sub>, <sup>2</sup>B<sub>2</sub>)</b>  |             |
| CCSD(T)/aug-cc-pVDZ                                                     | -264.180874 |
| CCSD(T)/aug-cc-pVTZ                                                     | -264.199647 |
| CCSD(T)/aug-cc-pVQZ                                                     | -264.20406  |
| CBS                                                                     | -264.20639  |
| <b>Li<sub>4</sub>Al-Ic (D<sub>4h</sub>, <sup>1</sup>A<sub>1g</sub>)</b> |             |
| CCSD(T)/aug-cc-pVDZ                                                     | -271.675851 |
| CCSD(T)/aug-cc-pVTZ                                                     | -271.699383 |

|                                                                         |              |
|-------------------------------------------------------------------------|--------------|
| CCSD(T)/aug-cc-pVQZ                                                     | -271.704856  |
| CBS                                                                     | -271.70774   |
| <b>Li<sub>5</sub>Al-IIc (C<sub>s</sub>, <sup>2</sup>A')</b>             |              |
| CCSD(T)/aug-cc-pVDZ                                                     | -279.161104  |
| CCSD(T)/aug-cc-pVTZ                                                     | -279.186892  |
| CCSD(T)/aug-cc-pVQZ                                                     | -279.192979  |
| CBS                                                                     | -279.1962    |
| <b>Li<sub>6</sub>Al-I (C<sub>s</sub>, <sup>2</sup>A')</b>               |              |
| CCSD(T)/aug-cc-pVDZ                                                     | -286.801025  |
| CCSD(T)/aug-cc-pVTZ                                                     | -286.829749  |
| <b>Li<sub>6</sub>Al-Ic (O<sub>h</sub>, <sup>1</sup>A<sub>1g</sub>)</b>  |              |
| CCSD(T)/aug-cc-pVDZ                                                     | -286.667688  |
| CCSD(T)/aug-cc-pVTZ                                                     | -286.697292  |
| <b>Li<sub>7</sub>Al-II (C<sub>s</sub>, <sup>1</sup>A')</b>              |              |
| CCSD(T)/aug-cc-pVDZ                                                     | -294.278642  |
| CCSD(T)/aug-cc-pVTZ                                                     | -294.309581  |
| <b>Li<sub>7</sub>Al-IIc (C<sub>3v</sub>, <sup>2</sup>A<sub>1</sub>)</b> |              |
| CCSD(T)/aug-cc-pVDZ                                                     | -294.132668  |
| CCSD(T)/aug-cc-pVTZ                                                     | -294.163336  |
| <b>Li<sub>8</sub>Al-I (C<sub>2v</sub>, <sup>2</sup>A<sub>1</sub>)</b>   |              |
| CCSD(T)/aug-cc-pVDZ                                                     | -301.7493998 |
| CCSD(T)/aug-cc-pVTZ                                                     | -301.782728  |
| <b>Li<sub>8</sub>Al-Ic (C<sub>3v</sub>, <sup>1</sup>A<sub>1</sub>)</b>  |              |
| CCSD(T)/aug-cc-pVDZ                                                     | -301.617740  |
| CCSD(T)/aug-cc-pVTZ                                                     | -301.6505092 |

**Table S3.** Coordinates of all isomers using the B3LYP/aug-cc-pVTZ level.

| Structure                                                                                                                                     | Cartesian coordinates |             |             |             |
|-----------------------------------------------------------------------------------------------------------------------------------------------|-----------------------|-------------|-------------|-------------|
| <br><b>LiAl (<math>^1\Sigma^+</math>)</b>                  | Li                    | 0.00000000  | 0.00000000  | -2.34472300 |
|                                                                                                                                               | Al                    | 0.00000000  | 0.00000000  | 0.54109000  |
| <br><b>LiAl (<math>^3\Sigma^-</math>)</b>                  | Li                    | 0.00000000  | 0.00000000  | -2.14438300 |
|                                                                                                                                               | Al                    | 0.00000000  | 0.00000000  | 0.49485800  |
| <br><b>LiAl<sup>+</sup> (<math>^2\Sigma^+</math>)</b>      | Li                    | 0.00000000  | 0.00000000  | -2.46872400 |
|                                                                                                                                               | Al                    | 0.00000000  | 0.00000000  | 0.56970600  |
| <br><b>Li<sub>2</sub>Al-I (<math>C_{2v}, ^2B_2</math>)</b> | Li                    | 0.00000000  | 1.56359300  | -1.38235500 |
|                                                                                                                                               | Al                    | 0.00000000  | 0.00000000  | 0.63801000  |
|                                                                                                                                               | Li                    | 0.00000000  | -1.56359300 | -1.38235500 |
| <b>Li<sub>2</sub>Al-II (<math>^2\Sigma^+</math>)</b>                                                                                          | Al                    | 0.00000000  | 0.12950100  | 0.00000000  |
|                                                                                                                                               | Li                    | 2.59256900  | -0.28058900 | 0.00000000  |
|                                                                                                                                               | Li                    | -2.59256900 | -0.28058100 | 0.00000000  |

|                                                                                                                                                     |    |            |             |             |
|-----------------------------------------------------------------------------------------------------------------------------------------------------|----|------------|-------------|-------------|
|  <p><b>Li<sub>2</sub>Al-III</b> (<math>C_{2v}, {}^2A_1</math>)</p> | Li | 0.00000000 | 2.54621600  | -0.49248400 |
|                                                                                                                                                     | Al | 0.00000000 | 0.00000000  | 0.22730000  |
|                                                                                                                                                     | Li | 0.00000000 | -2.54621600 | -0.49248400 |
| <p><b>Li<sub>2</sub>Al-IV</b> (<math>{}^2\Sigma_g^+</math>)</p>                                                                                     | Al | 0.00000000 | 0.00000000  | 1.45637132  |
|                                                                                                                                                     | Li | 0.00000000 | 0.00000000  | -1.60434168 |
|                                                                                                                                                     | Li | 0.00000000 | 0.00000000  | -4.70660068 |

|                                                                                                                                                       |    |             |             |             |
|-------------------------------------------------------------------------------------------------------------------------------------------------------|----|-------------|-------------|-------------|
|  <p><b>Li<sub>2</sub>Al-Ic</b> (<math>{}^1\Sigma_g^+</math>)</p>     | Al | 0.00000000  | 0.00000000  | 0.00000000  |
|                                                                                                                                                       | Li | 0.00000000  | 0.00000000  | 2.75400200  |
|                                                                                                                                                       | Li | 0.00000000  | 0.00000000  | -2.75400200 |
|  <p><b>Li<sub>2</sub>Al-IIc</b> (<math>C_{2v}, {}^1A_1</math>)</p>   | Li | 0.00000000  | 1.42498900  | -2.01039400 |
|                                                                                                                                                       | Al | 0.00000000  | 0.00000000  | 0.92787400  |
|                                                                                                                                                       | Li | 0.00000000  | -1.42498900 | -2.01039400 |
|  <p><b>Li<sub>3</sub>Al-I</b> (<math>C_{2v}, {}^1A_1</math>)</p>   | Li | 0.00000000  | -2.47969589 | -0.38248610 |
|                                                                                                                                                       | Li | -0.00000000 | 2.47969589  | -0.38248610 |
|                                                                                                                                                       | Li | 0.00000000  | 0.00000000  | -2.16245727 |
|                                                                                                                                                       | Al | 0.00000000  | 0.00000000  | 0.67556073  |
|  <p><b>Li<sub>3</sub>Al-II</b> (<math>D_{3h}, {}^1A_1'</math>)</p> | Al | 0.00000000  | 0.00000000  | 0.00000000  |
|                                                                                                                                                       | Li | 0.00000000  | 2.63625100  | 0.00000000  |
|                                                                                                                                                       | Li | 2.28306000  | -1.31812500 | 0.00000000  |
|                                                                                                                                                       | Li | -2.28306000 | -1.31812500 | 0.00000000  |
|  <p><b>Li<sub>3</sub>Al-III</b> (<math>C_{3v}, {}^3A_1</math>)</p> | Al | 0.00000000  | 0.00000000  | 0.88344800  |
|                                                                                                                                                       | Li | 0.00000000  | 1.67074800  | -1.27609200 |
|                                                                                                                                                       | Li | -1.44691000 | -0.83537400 | -1.27609200 |
|                                                                                                                                                       | Li | 1.44691000  | -0.83537400 | -1.27609200 |

|                                                                                                                                                                     |                                                                                                                                                                                                                                                                                        |
|---------------------------------------------------------------------------------------------------------------------------------------------------------------------|----------------------------------------------------------------------------------------------------------------------------------------------------------------------------------------------------------------------------------------------------------------------------------------|
| 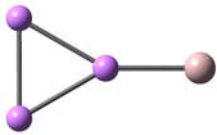 <p><b>Li<sub>3</sub>Al-IV</b> (<math>C_{2v}</math>, <math>^3B_2</math>)</p>       | <p>Li 0.00000000 1.43877800 -3.40456800<br/>                 Li 0.00000000 -1.43877800 -3.40456800<br/>                 Li 0.00000000 0.00000000 -0.92164800<br/>                 Al 0.00000000 0.00000000 1.78402700</p>                                                              |
|  <p><b>Li<sub>3</sub>Al-Ic</b> (<math>C_{2v}</math>, <math>^2B_2</math>)</p>       | <p>Al 0.00000000 0.00000000 0.23004000<br/>                 Li 0.00000000 0.00000000 2.88623700<br/>                 Li 0.00000000 1.63529200 -1.94153900<br/>                 Li 0.00000000 -1.63529200 -1.94153900</p>                                                               |
|  <p><b>Li<sub>3</sub>Al-IIIc</b> (<math>C_{3v}</math>, <math>^4A_1</math>)</p>    | <p>Al 0.00000000 -0.00000000 0.61671600<br/>                 Li 0.00000000 2.18242688 -0.89081262<br/>                 Li -1.89003712 -1.09121344 -0.89081262<br/>                 Li 1.89003712 -1.09121344 -0.89081262</p>                                                           |
|  <p><b>Li<sub>4</sub>Al-I</b> (<math>C_{2v}</math>, <math>^2B_2</math>)</p>      | <p>Li 0.00000000 1.39388800 -1.48731388<br/>                 Li 2.41483100 -0.00000000 -0.29696888<br/>                 Li -2.41483100 -0.00000000 -0.29696888<br/>                 Li 0.00000000 -1.39388800 -1.48731388<br/>                 Al 0.00000000 0.00000000 0.82351512</p> |
|  <p><b>Li<sub>4</sub>Al-II</b> (<math>C_{4v}</math>, <math>^2A_1</math>)</p>     | <p>Li 0.00000000 2.36335700 -0.52045800<br/>                 Li 2.36335500 0.00000000 -0.52046000<br/>                 Li -2.36335500 0.00000000 -0.52046000<br/>                 Li 0.00000000 -2.36335700 -0.52045800<br/>                 Al 0.00000000 0.00000000 0.48042400</p>   |
|  <p><b>Li<sub>4</sub>Al-III</b> (<math>D_{4h}</math>, <math>^2A_{2u}</math>)</p> | <p>Li 0.00000000 2.50880600 0.00000000<br/>                 Li 2.50880600 0.00000000 0.00000000<br/>                 Li 0.00000000 -2.50880600 0.00000000<br/>                 Li -2.50880600 0.00000000 0.00000000<br/>                 Al 0.00000000 0.00000000 0.00000000</p>       |



|                                                                                                                                                        |                                                                                                                                                                                                        |
|--------------------------------------------------------------------------------------------------------------------------------------------------------|--------------------------------------------------------------------------------------------------------------------------------------------------------------------------------------------------------|
|  <p><b>Li<sub>4</sub>Al-IV</b> (<math>C_{3v}, {}^4A_1</math>)</p>     | Li 0.00000000 1.60425900 -0.83716200<br>Li -1.38932900 -0.80212900 -0.83716200<br>Li 1.38932900 -0.80212900 -0.83716200<br>Al 0.00000000 0.00000000 1.37423600<br>Li 0.00000000 0.00000000 -3.44353700 |
|  <p><b>Li<sub>4</sub>Al-V</b> (<math>C_{2v}, {}^4A_2</math>)</p>      | Li -1.39016900 -1.43394400 0.00000000<br>Li 1.39096800 -1.43352700 0.00000000<br>Li 0.00173500 -4.07893200 0.00000000<br>Al 0.00000000 0.82828500 0.00000000<br>Li -0.00253400 3.35716900 0.00000000   |
|  <p><b>Li<sub>4</sub>Al-Ic</b> (<math>D_{4h}, {}^1A_{1g}</math>)</p> | Li 0.00000000 2.61733500 0.00000000<br>Li 2.61733500 0.00000000 0.00000000<br>Li 0.00000000 -2.61733500 0.00000000<br>Li -2.61733500 0.00000000 0.00000000<br>Al 0.00000000 0.00000000 0.00000000      |
|                                                                     | Li -0.00000700 1.74683300 -1.33540000<br>Li -2.58636800 0.04748300 -0.00000800<br>Li 2.58636800 0.04748300 -0.00001500<br>Li 0.00000700 1.74285200 1.33747600<br>Al 0.00000000 -0.82722700 -0.00047400 |

|                                                                                                                                                     |                                                                                                                                                                                                                                                |
|-----------------------------------------------------------------------------------------------------------------------------------------------------|------------------------------------------------------------------------------------------------------------------------------------------------------------------------------------------------------------------------------------------------|
| 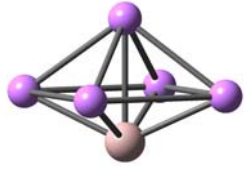 <p><b>Li<sub>5</sub>Al-I</b> (<math>C_{4v}, {}^1A_1</math>)</p> | Al -0.00000400 0.00000000 -0.75919000<br>Li 0.02510300 -2.36107100 0.32065400<br>Li 2.36107000 0.02509300 0.32065000<br>Li -0.02508400 2.36107200 0.32065400<br>Li 0.00000000 0.00000000 2.00720800<br>Li -2.36107300 -0.02509300 0.32065700   |
|  <p><b>Li<sub>5</sub>Al-II</b> (<math>C_s, {}^3A'</math>)</p>    | Al -0.21585400 -0.46478600 -0.00000100<br>Li -1.29495900 1.93300800 0.00000200<br>Li -2.85647100 -0.74974600 0.00000100<br>Li 2.28559200 -1.39758000 0.00000200<br>Li 1.40060300 1.11419400 1.38372900<br>Li 1.40060200 1.11419700 -1.38372800 |

|                                                                                                                                                  |                                                                                                                                                                                                                                                                                                                                                                                                                                                                                                                                          |             |             |             |             |    |             |            |             |    |             |             |            |    |            |             |            |    |             |            |            |    |            |             |             |
|--------------------------------------------------------------------------------------------------------------------------------------------------|------------------------------------------------------------------------------------------------------------------------------------------------------------------------------------------------------------------------------------------------------------------------------------------------------------------------------------------------------------------------------------------------------------------------------------------------------------------------------------------------------------------------------------------|-------------|-------------|-------------|-------------|----|-------------|------------|-------------|----|-------------|-------------|------------|----|------------|-------------|------------|----|-------------|------------|------------|----|------------|-------------|-------------|
| 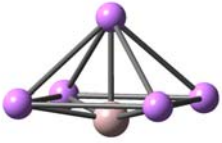 <p><b>Li<sub>5</sub>Al-Ic</b> (<math>C_{4v}, ^2A_1</math>)</p> | <table border="1"> <tbody> <tr><td>Al</td><td>0.00000000</td><td>0.00000000</td><td>0.45573600</td></tr> <tr><td>Li</td><td>0.00000000</td><td>0.00000000</td><td>-2.03804700</td></tr> <tr><td>Li</td><td>0.00000000</td><td>2.54846800</td><td>0.01579800</td></tr> <tr><td>Li</td><td>2.54846800</td><td>0.00000000</td><td>0.01579800</td></tr> <tr><td>Li</td><td>-2.54846800</td><td>0.00000000</td><td>0.01579800</td></tr> <tr><td>Li</td><td>0.00000000</td><td>-2.54846800</td><td>0.01579800</td></tr> </tbody> </table>      | Al          | 0.00000000  | 0.00000000  | 0.45573600  | Li | 0.00000000  | 0.00000000 | -2.03804700 | Li | 0.00000000  | 2.54846800  | 0.01579800 | Li | 2.54846800 | 0.00000000  | 0.01579800 | Li | -2.54846800 | 0.00000000 | 0.01579800 | Li | 0.00000000 | -2.54846800 | 0.01579800  |
| Al                                                                                                                                               | 0.00000000                                                                                                                                                                                                                                                                                                                                                                                                                                                                                                                               | 0.00000000  | 0.45573600  |             |             |    |             |            |             |    |             |             |            |    |            |             |            |    |             |            |            |    |            |             |             |
| Li                                                                                                                                               | 0.00000000                                                                                                                                                                                                                                                                                                                                                                                                                                                                                                                               | 0.00000000  | -2.03804700 |             |             |    |             |            |             |    |             |             |            |    |            |             |            |    |             |            |            |    |            |             |             |
| Li                                                                                                                                               | 0.00000000                                                                                                                                                                                                                                                                                                                                                                                                                                                                                                                               | 2.54846800  | 0.01579800  |             |             |    |             |            |             |    |             |             |            |    |            |             |            |    |             |            |            |    |            |             |             |
| Li                                                                                                                                               | 2.54846800                                                                                                                                                                                                                                                                                                                                                                                                                                                                                                                               | 0.00000000  | 0.01579800  |             |             |    |             |            |             |    |             |             |            |    |            |             |            |    |             |            |            |    |            |             |             |
| Li                                                                                                                                               | -2.54846800                                                                                                                                                                                                                                                                                                                                                                                                                                                                                                                              | 0.00000000  | 0.01579800  |             |             |    |             |            |             |    |             |             |            |    |            |             |            |    |             |            |            |    |            |             |             |
| Li                                                                                                                                               | 0.00000000                                                                                                                                                                                                                                                                                                                                                                                                                                                                                                                               | -2.54846800 | 0.01579800  |             |             |    |             |            |             |    |             |             |            |    |            |             |            |    |             |            |            |    |            |             |             |
|  <p><b>Li<sub>5</sub>Al-IIc</b> (<math>C_s, ^2A'</math>)</p>    | <table border="1"> <tbody> <tr><td>Al</td><td>-0.21585400</td><td>-0.46478600</td><td>-0.00000100</td></tr> <tr><td>Li</td><td>-1.29495900</td><td>1.93300800</td><td>0.00000200</td></tr> <tr><td>Li</td><td>-2.85647100</td><td>-0.74974600</td><td>0.00000100</td></tr> <tr><td>Li</td><td>2.28559200</td><td>-1.39758000</td><td>0.00000200</td></tr> <tr><td>Li</td><td>1.40060300</td><td>1.11419400</td><td>1.38372900</td></tr> <tr><td>Li</td><td>1.40060200</td><td>1.11419700</td><td>-1.38372800</td></tr> </tbody> </table> | Al          | -0.21585400 | -0.46478600 | -0.00000100 | Li | -1.29495900 | 1.93300800 | 0.00000200  | Li | -2.85647100 | -0.74974600 | 0.00000100 | Li | 2.28559200 | -1.39758000 | 0.00000200 | Li | 1.40060300  | 1.11419400 | 1.38372900 | Li | 1.40060200 | 1.11419700  | -1.38372800 |
| Al                                                                                                                                               | -0.21585400                                                                                                                                                                                                                                                                                                                                                                                                                                                                                                                              | -0.46478600 | -0.00000100 |             |             |    |             |            |             |    |             |             |            |    |            |             |            |    |             |            |            |    |            |             |             |
| Li                                                                                                                                               | -1.29495900                                                                                                                                                                                                                                                                                                                                                                                                                                                                                                                              | 1.93300800  | 0.00000200  |             |             |    |             |            |             |    |             |             |            |    |            |             |            |    |             |            |            |    |            |             |             |
| Li                                                                                                                                               | -2.85647100                                                                                                                                                                                                                                                                                                                                                                                                                                                                                                                              | -0.74974600 | 0.00000100  |             |             |    |             |            |             |    |             |             |            |    |            |             |            |    |             |            |            |    |            |             |             |
| Li                                                                                                                                               | 2.28559200                                                                                                                                                                                                                                                                                                                                                                                                                                                                                                                               | -1.39758000 | 0.00000200  |             |             |    |             |            |             |    |             |             |            |    |            |             |            |    |             |            |            |    |            |             |             |
| Li                                                                                                                                               | 1.40060300                                                                                                                                                                                                                                                                                                                                                                                                                                                                                                                               | 1.11419400  | 1.38372900  |             |             |    |             |            |             |    |             |             |            |    |            |             |            |    |             |            |            |    |            |             |             |
| Li                                                                                                                                               | 1.40060200                                                                                                                                                                                                                                                                                                                                                                                                                                                                                                                               | 1.11419700  | -1.38372800 |             |             |    |             |            |             |    |             |             |            |    |            |             |            |    |             |            |            |    |            |             |             |

| Structure                                                                                                                                           | Coordinates                                                                                                                                                                                                                                                                                                                                                                                                                                                                                                                                                                                                               |             |             |             |             |    |             |             |             |    |            |            |             |    |            |             |             |    |             |             |             |    |             |             |             |    |            |             |             |
|-----------------------------------------------------------------------------------------------------------------------------------------------------|---------------------------------------------------------------------------------------------------------------------------------------------------------------------------------------------------------------------------------------------------------------------------------------------------------------------------------------------------------------------------------------------------------------------------------------------------------------------------------------------------------------------------------------------------------------------------------------------------------------------------|-------------|-------------|-------------|-------------|----|-------------|-------------|-------------|----|------------|------------|-------------|----|------------|-------------|-------------|----|-------------|-------------|-------------|----|-------------|-------------|-------------|----|------------|-------------|-------------|
| 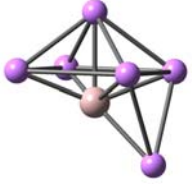 <p><b>Li<sub>6</sub>Al-I</b> (<math>C_s, ^2A'</math>)</p>        | <table border="1"> <tbody> <tr><td>Li</td><td>-1.91916800</td><td>-1.65664800</td><td>-0.59200900</td></tr> <tr><td>Li</td><td>-1.33529500</td><td>-0.00016500</td><td>1.76956000</td></tr> <tr><td>Li</td><td>1.15166100</td><td>1.57879300</td><td>1.23413100</td></tr> <tr><td>Li</td><td>2.63031700</td><td>0.00023800</td><td>-1.00272000</td></tr> <tr><td>Li</td><td>1.15242000</td><td>-1.57886100</td><td>1.23489800</td></tr> <tr><td>Li</td><td>-1.91500400</td><td>1.65993200</td><td>-0.59067600</td></tr> <tr><td>Al</td><td>0.05424700</td><td>-0.00075900</td><td>-0.47381200</td></tr> </tbody> </table> | Li          | -1.91916800 | -1.65664800 | -0.59200900 | Li | -1.33529500 | -0.00016500 | 1.76956000  | Li | 1.15166100 | 1.57879300 | 1.23413100  | Li | 2.63031700 | 0.00023800  | -1.00272000 | Li | 1.15242000  | -1.57886100 | 1.23489800  | Li | -1.91500400 | 1.65993200  | -0.59067600 | Al | 0.05424700 | -0.00075900 | -0.47381200 |
| Li                                                                                                                                                  | -1.91916800                                                                                                                                                                                                                                                                                                                                                                                                                                                                                                                                                                                                               | -1.65664800 | -0.59200900 |             |             |    |             |             |             |    |            |            |             |    |            |             |             |    |             |             |             |    |             |             |             |    |            |             |             |
| Li                                                                                                                                                  | -1.33529500                                                                                                                                                                                                                                                                                                                                                                                                                                                                                                                                                                                                               | -0.00016500 | 1.76956000  |             |             |    |             |             |             |    |            |            |             |    |            |             |             |    |             |             |             |    |             |             |             |    |            |             |             |
| Li                                                                                                                                                  | 1.15166100                                                                                                                                                                                                                                                                                                                                                                                                                                                                                                                                                                                                                | 1.57879300  | 1.23413100  |             |             |    |             |             |             |    |            |            |             |    |            |             |             |    |             |             |             |    |             |             |             |    |            |             |             |
| Li                                                                                                                                                  | 2.63031700                                                                                                                                                                                                                                                                                                                                                                                                                                                                                                                                                                                                                | 0.00023800  | -1.00272000 |             |             |    |             |             |             |    |            |            |             |    |            |             |             |    |             |             |             |    |             |             |             |    |            |             |             |
| Li                                                                                                                                                  | 1.15242000                                                                                                                                                                                                                                                                                                                                                                                                                                                                                                                                                                                                                | -1.57886100 | 1.23489800  |             |             |    |             |             |             |    |            |            |             |    |            |             |             |    |             |             |             |    |             |             |             |    |            |             |             |
| Li                                                                                                                                                  | -1.91500400                                                                                                                                                                                                                                                                                                                                                                                                                                                                                                                                                                                                               | 1.65993200  | -0.59067600 |             |             |    |             |             |             |    |            |            |             |    |            |             |             |    |             |             |             |    |             |             |             |    |            |             |             |
| Al                                                                                                                                                  | 0.05424700                                                                                                                                                                                                                                                                                                                                                                                                                                                                                                                                                                                                                | -0.00075900 | -0.47381200 |             |             |    |             |             |             |    |            |            |             |    |            |             |             |    |             |             |             |    |             |             |             |    |            |             |             |
|  <p><b>Li<sub>6</sub>Al-II</b> (<math>C_{5v}, ^2A_1</math>)</p>  | <table border="1"> <tbody> <tr><td>Al</td><td>0.00000000</td><td>0.00000000</td><td>0.66835000</td></tr> <tr><td>Li</td><td>0.00000000</td><td>2.51403900</td><td>-0.18574300</td></tr> <tr><td>Li</td><td>2.39099300</td><td>0.77688100</td><td>-0.18574300</td></tr> <tr><td>Li</td><td>1.47771500</td><td>-2.03390000</td><td>-0.18574300</td></tr> <tr><td>Li</td><td>-2.39099300</td><td>0.77688100</td><td>-0.18574300</td></tr> <tr><td>Li</td><td>-1.47771500</td><td>-2.03390000</td><td>-0.18574300</td></tr> <tr><td>Li</td><td>0.00000000</td><td>0.00000000</td><td>-1.96746900</td></tr> </tbody> </table>  | Al          | 0.00000000  | 0.00000000  | 0.66835000  | Li | 0.00000000  | 2.51403900  | -0.18574300 | Li | 2.39099300 | 0.77688100 | -0.18574300 | Li | 1.47771500 | -2.03390000 | -0.18574300 | Li | -2.39099300 | 0.77688100  | -0.18574300 | Li | -1.47771500 | -2.03390000 | -0.18574300 | Li | 0.00000000 | 0.00000000  | -1.96746900 |
| Al                                                                                                                                                  | 0.00000000                                                                                                                                                                                                                                                                                                                                                                                                                                                                                                                                                                                                                | 0.00000000  | 0.66835000  |             |             |    |             |             |             |    |            |            |             |    |            |             |             |    |             |             |             |    |             |             |             |    |            |             |             |
| Li                                                                                                                                                  | 0.00000000                                                                                                                                                                                                                                                                                                                                                                                                                                                                                                                                                                                                                | 2.51403900  | -0.18574300 |             |             |    |             |             |             |    |            |            |             |    |            |             |             |    |             |             |             |    |             |             |             |    |            |             |             |
| Li                                                                                                                                                  | 2.39099300                                                                                                                                                                                                                                                                                                                                                                                                                                                                                                                                                                                                                | 0.77688100  | -0.18574300 |             |             |    |             |             |             |    |            |            |             |    |            |             |             |    |             |             |             |    |             |             |             |    |            |             |             |
| Li                                                                                                                                                  | 1.47771500                                                                                                                                                                                                                                                                                                                                                                                                                                                                                                                                                                                                                | -2.03390000 | -0.18574300 |             |             |    |             |             |             |    |            |            |             |    |            |             |             |    |             |             |             |    |             |             |             |    |            |             |             |
| Li                                                                                                                                                  | -2.39099300                                                                                                                                                                                                                                                                                                                                                                                                                                                                                                                                                                                                               | 0.77688100  | -0.18574300 |             |             |    |             |             |             |    |            |            |             |    |            |             |             |    |             |             |             |    |             |             |             |    |            |             |             |
| Li                                                                                                                                                  | -1.47771500                                                                                                                                                                                                                                                                                                                                                                                                                                                                                                                                                                                                               | -2.03390000 | -0.18574300 |             |             |    |             |             |             |    |            |            |             |    |            |             |             |    |             |             |             |    |             |             |             |    |            |             |             |
| Li                                                                                                                                                  | 0.00000000                                                                                                                                                                                                                                                                                                                                                                                                                                                                                                                                                                                                                | 0.00000000  | -1.96746900 |             |             |    |             |             |             |    |            |            |             |    |            |             |             |    |             |             |             |    |             |             |             |    |            |             |             |
|  <p><b>Li<sub>6</sub>Al-III</b> (<math>O_h, ^2A_{1g}</math>)</p> | <table border="1"> <tbody> <tr><td>Li</td><td>0.00000000</td><td>0.00000000</td><td>2.50183600</td></tr> <tr><td>Li</td><td>0.00000000</td><td>2.50183600</td><td>0.00000000</td></tr> <tr><td>Li</td><td>0.00000000</td><td>0.00000000</td><td>-2.50183600</td></tr> <tr><td>Li</td><td>2.50183600</td><td>0.00000000</td><td>0.00000000</td></tr> <tr><td>Li</td><td>0.00000000</td><td>-2.50183600</td><td>0.00000000</td></tr> <tr><td>Li</td><td>-2.50183600</td><td>0.00000000</td><td>0.00000000</td></tr> <tr><td>Al</td><td>0.00000000</td><td>0.00000000</td><td>0.00000000</td></tr> </tbody> </table>         | Li          | 0.00000000  | 0.00000000  | 2.50183600  | Li | 0.00000000  | 2.50183600  | 0.00000000  | Li | 0.00000000 | 0.00000000 | -2.50183600 | Li | 2.50183600 | 0.00000000  | 0.00000000  | Li | 0.00000000  | -2.50183600 | 0.00000000  | Li | -2.50183600 | 0.00000000  | 0.00000000  | Al | 0.00000000 | 0.00000000  | 0.00000000  |
| Li                                                                                                                                                  | 0.00000000                                                                                                                                                                                                                                                                                                                                                                                                                                                                                                                                                                                                                | 0.00000000  | 2.50183600  |             |             |    |             |             |             |    |            |            |             |    |            |             |             |    |             |             |             |    |             |             |             |    |            |             |             |
| Li                                                                                                                                                  | 0.00000000                                                                                                                                                                                                                                                                                                                                                                                                                                                                                                                                                                                                                | 2.50183600  | 0.00000000  |             |             |    |             |             |             |    |            |            |             |    |            |             |             |    |             |             |             |    |             |             |             |    |            |             |             |
| Li                                                                                                                                                  | 0.00000000                                                                                                                                                                                                                                                                                                                                                                                                                                                                                                                                                                                                                | 0.00000000  | -2.50183600 |             |             |    |             |             |             |    |            |            |             |    |            |             |             |    |             |             |             |    |             |             |             |    |            |             |             |
| Li                                                                                                                                                  | 2.50183600                                                                                                                                                                                                                                                                                                                                                                                                                                                                                                                                                                                                                | 0.00000000  | 0.00000000  |             |             |    |             |             |             |    |            |            |             |    |            |             |             |    |             |             |             |    |             |             |             |    |            |             |             |
| Li                                                                                                                                                  | 0.00000000                                                                                                                                                                                                                                                                                                                                                                                                                                                                                                                                                                                                                | -2.50183600 | 0.00000000  |             |             |    |             |             |             |    |            |            |             |    |            |             |             |    |             |             |             |    |             |             |             |    |            |             |             |
| Li                                                                                                                                                  | -2.50183600                                                                                                                                                                                                                                                                                                                                                                                                                                                                                                                                                                                                               | 0.00000000  | 0.00000000  |             |             |    |             |             |             |    |            |            |             |    |            |             |             |    |             |             |             |    |             |             |             |    |            |             |             |
| Al                                                                                                                                                  | 0.00000000                                                                                                                                                                                                                                                                                                                                                                                                                                                                                                                                                                                                                | 0.00000000  | 0.00000000  |             |             |    |             |             |             |    |            |            |             |    |            |             |             |    |             |             |             |    |             |             |             |    |            |             |             |

|                                                                                                                                                                |                                                                                                                                                                                                                                                                                                                                    |
|----------------------------------------------------------------------------------------------------------------------------------------------------------------|------------------------------------------------------------------------------------------------------------------------------------------------------------------------------------------------------------------------------------------------------------------------------------------------------------------------------------|
| 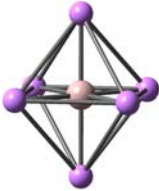 <p><b>Li<sub>6</sub>Al-Ic</b> (<math>O_h</math>, <math>^1A_{1g}</math>)</p>  | Li 0.00000000 0.00000000 2.51180300<br>Li 0.00000000 2.51180300 0.00000000<br>Li 0.00000000 0.00000000 -2.51180300<br>Li 2.51180300 0.00000000 0.00000000<br>Li 0.00000000 -2.51180300 0.00000000<br>Li -2.51180300 0.00000000 0.00000000<br>Al 0.00000000 0.00000000 0.00000000                                                   |
|  <p><b>Li<sub>6</sub>Al-IIc</b> (<math>C_{5v}</math>, <math>^1A_1</math>)</p> | Al -0.00005600 0.00004800 -0.64729700<br>Li 2.21645800 -1.24448200 0.14824900<br>Li 1.86851800 1.72333800 0.14960700<br>Li -1.06125500 2.30982100 0.14932600<br>Li -0.49905600 -2.49233900 0.14912100<br>Li -2.52484100 -0.29536300 0.14902300<br>Li 0.00042000 -0.00118200 2.05962600                                             |
|  <p><b>Li<sub>7</sub>Al-I</b> (<math>C_s</math>, <math>^1A_1</math>)</p>     | Li -0.03655518 2.04061185 -1.73956212<br>Li 1.20787566 -0.63498472 2.39112150<br>Li -0.03655518 2.04061185 1.73956212<br>Li -1.73120677 -0.39000072 -1.58016892<br>Li -1.73120677 -0.39000072 1.58016892<br>Li 1.20787566 -0.63498472 -2.39112150<br>Li -0.08659746 -2.44757383 0.00000000<br>Al 0.27775714 0.09552708 0.00000000  |
|  <p><b>Li<sub>7</sub>Al-II</b> (<math>C_s</math>, <math>^1A_1</math>)</p>   | Li 0.00623589 -1.08041280 2.36516038<br>Li 0.00623589 -1.08041280 -2.36516038<br>Al 0.39439402 0.02525692 0.00000000<br>Li -1.08048302 1.67097079 1.40827021<br>Li 0.85119468 -2.67997297 0.00000000<br>Li -1.08048302 1.67097079 -1.40827021<br>Li 1.48438342 2.51349618 0.00000000<br>Li -1.89606470 -1.12414863 0.00000000      |
|  <p><b>Li<sub>7</sub>Al-III</b> (<math>C_s</math>, <math>^1A_1</math>)</p>  | Li 1.08041300 2.36516000 -0.00623500<br>Li 1.08036100 -2.36517800 -0.00621400<br>Al -0.02525700 -0.00000100 -0.39439400<br>Li -1.67097100 1.40827000 1.08048300<br>Li 2.67997300 -0.00002500 -0.85119400<br>Li -1.67098300 -1.40821800 1.08052000<br>Li -2.51349600 -0.00001100 -1.48438400<br>Li 1.12414800 0.00000400 1.89606500 |
|                                                                             | Li 0.00000000 -2.66226500 -0.00000000<br>Li -0.00000000 -0.00000000 -2.56996000<br>Li 0.00000000 -0.00000000 2.56996000<br>Li -2.53196448 -0.82268513 -0.00000000<br>Li 2.53196448 -0.82268513 -0.00000000                                                                                                                         |

|                                                                                                                                                      |                                                                                                                                                                                                                                                                                                                                                                                                                                                                                                  |
|------------------------------------------------------------------------------------------------------------------------------------------------------|--------------------------------------------------------------------------------------------------------------------------------------------------------------------------------------------------------------------------------------------------------------------------------------------------------------------------------------------------------------------------------------------------------------------------------------------------------------------------------------------------|
| <p><b>Li<sub>7</sub>Al-IV</b> (<math>D_{5h}, ^1A_1'</math>)</p>                                                                                      | <p>Li 1.56484010 2.15381763 -0.00000000<br/>                     Li -1.56484010 2.15381763 -0.00000000<br/>                     Al 0.00000000 -0.00000000 0.00000000</p>                                                                                                                                                                                                                                                                                                                         |
| 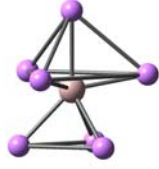 <p><b>Li<sub>7</sub>Al-V</b> (<math>C_{3v}, ^1A_1</math>)</p>      | <p>Li 0.00000000 1.75383562 -1.80796591<br/>                     Li -2.18606879 1.26212741 0.69572833<br/>                     Li -0.00000000 -0.00000000 2.79002097<br/>                     Li 1.51886620 -0.87691781 -1.80796591<br/>                     Li 0.00000000 -2.52425481 0.69572833<br/>                     Li 2.18606879 1.26212741 0.69572833<br/>                     Li -1.51886620 -0.87691781 -1.80796591<br/>                     Al 0.00000000 -0.00000000 0.12615997</p> |
|  <p><b>Li<sub>7</sub>Al-VI</b> (<math>C_{2v}, ^1A_1</math>)</p>     | <p>Li -0.11206300 1.78423600 1.54666200<br/>                     Li -0.11206300 -1.78423600 1.54666300<br/>                     Li 2.22856600 -3.03897700 0.00000000<br/>                     Li -0.11206300 1.78423600 -1.54666200<br/>                     Li 2.22854500 3.03898000 0.00000000<br/>                     Li 1.46869600 0.00000300 0.00000000<br/>                     Al -1.26405100 -0.00000200 0.00000000<br/>                     Li -0.11206300 -1.78423600 -1.54666300</p> |
|  <p><b>Li<sub>7</sub>Al-IIIc</b> (<math>C_{3v}, ^2A_1</math>)</p> | <p>Li 1.51886600 0.87691800 -1.80796600<br/>                     Li 0.00000000 2.52425500 0.69572800<br/>                     Li 0.00000000 0.00000000 2.79002100<br/>                     Li 0.00000000 -1.75383600 -1.80796600<br/>                     Li -2.18606900 -1.26212700 0.69572800<br/>                     Li 2.18606900 -1.26212700 0.69572800<br/>                     Li -1.51886600 0.87691800 -1.80796600<br/>                     Al 0.00000000 0.00000000 0.12616000</p>    |
|  <p><b>Li<sub>7</sub>Al-IIIc</b> (<math>C_{2v}, ^2A_1</math>)</p> | <p>Li 0.00000000 0.00000000 -2.47183515<br/>                     Li 1.67924836 -1.87178534 -0.52878696<br/>                     Li -1.67924836 -1.87178534 -0.52878696<br/>                     Li 1.67924836 1.87178534 -0.52878696<br/>                     Li -1.67924836 1.87178534 -0.52878696<br/>                     Li 0.00000000 1.79453878 2.03496805<br/>                     Li 0.00000000 -1.79453878 2.03496805<br/>                     Al 0.00000000 0.00000000 0.11928785</p>  |
|  <p><b>Li<sub>7</sub>Al-IV</b> (<math>D_{5h}, ^2A_1'</math>)</p>  | <p>Li 0.00000000 -2.61089560 0.00000000<br/>                     Li 0.00000000 0.00000000 -2.54151191<br/>                     Li -2.48310928 -0.80681111 0.00000000<br/>                     Li 0.00000000 0.00000000 2.54151191<br/>                     Li 2.48310928 -0.80681111 0.00000000<br/>                     Li 1.53464593 2.11225891 0.00000000<br/>                     Li -1.53464593 2.11225891 0.00000000<br/>                     Al 0.00000000 0.00000000 0.00000000</p>      |

|                                                                                                                                       |                                                                                                                                                                                                                                                                                                                                                                          |
|---------------------------------------------------------------------------------------------------------------------------------------|--------------------------------------------------------------------------------------------------------------------------------------------------------------------------------------------------------------------------------------------------------------------------------------------------------------------------------------------------------------------------|
| 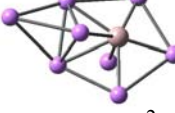<br><b>Li<sub>8</sub>Al-II</b> ( $C_{s, 2A'}$ )      | Li -1.86357005 0.86507335 -1.39018421<br>Li 1.85804209 -2.23929913 -0.29527621<br>Li -4.21443301 -0.48322730 0.16156316<br>Li -1.56065008 0.72126318 1.30644584<br>Li 0.56859384 2.48551999 0.30946734<br>Li 1.31208996 -0.36376247 1.98795421<br>Li 3.11002296 0.44233191 -0.35460800<br>Al 0.51234998 0.06034977 -0.41238893<br>Li -1.43027894 -1.68941519 0.06165657  |
| <br><b>Li<sub>8</sub>Al-I</b> ( $C_{2v, 2A_1}$ )     | Li 0.00000000 -2.23713601 1.17031330<br>Li 1.95152718 1.61208556 -1.07422415<br>Li -1.95152718 -1.61208556 -1.07422415<br>Li -1.95152718 1.61208556 -1.07422415<br>Li -2.12108405 0.00000000 1.37241623<br>Li 2.12108405 0.00000000 1.37241623<br>Li 1.95152718 -1.61208556 -1.07422415<br>Li -0.00000000 2.23713601 1.17031330<br>Al 0.00000000 0.00000000 -0.18203189  |
| <br><b>Li<sub>8</sub>Al-Ic</b> ( $C_{3v, 1A_1}$ )   | Li 1.38107700 0.79736500 -1.56870900<br>Li 0.00000000 -1.59473000 -1.56870900<br>Li -1.38107700 0.79736500 -1.56870900<br>Li 0.00000000 2.50496900 1.09964600<br>Li 2.16936700 -1.25248500 1.09964600<br>Li 0.00000000 0.00000000 -4.26194700<br>Li -2.16936700 -1.25248500 1.09964600<br>Li 0.00000000 0.00000000 3.22033100<br>Al 0.00000000 0.00000000 0.56510800     |
| <br><b>Li<sub>8</sub>Al-IIc</b> ( $D_{2d, 1A_1}$ ) | Li -1.03475600 1.69535900 1.69539900<br>Li -1.03475600 -1.69535900 -1.69539900<br>Li 1.03475600 1.69535900 -1.69539900<br>Li 2.33926200 -1.01868400 -1.01865900<br>Li 2.33926200 1.01868400 1.01865900<br>Li -2.33926200 -1.01868400 1.01865900<br>Li -2.33926200 1.01868400 -1.01865900<br>Li 1.03475600 -1.69535900 1.69539900<br>Al -0.00000000 0.00000000 0.00000000 |
